# Supplementary material
Source: Royal Society of Chemistry journal article supplement (doi:10.1039/d6py00256k)
Supplement: d6py00256k1.pdf [file d6py00256k1.pdf]

## Supporting information

### Robust, UV-resistant and transparent vitrimers from bio-based mercaptan via maleimide-thiol “click” chemistry for carbon fiber reinforced polymer composites

Yue Wang, Jialiang Zhong, Yanning Zeng\*

College of Material Science and Engineering, Guilin University of Technology,  
Guilin 541004, P. R. China

\* Corresponding author, E-mail: [ynzeng@glut.edu.cn](mailto:ynzeng@glut.edu.cn)

#### Scheme S1 Synthesis of E-4SH

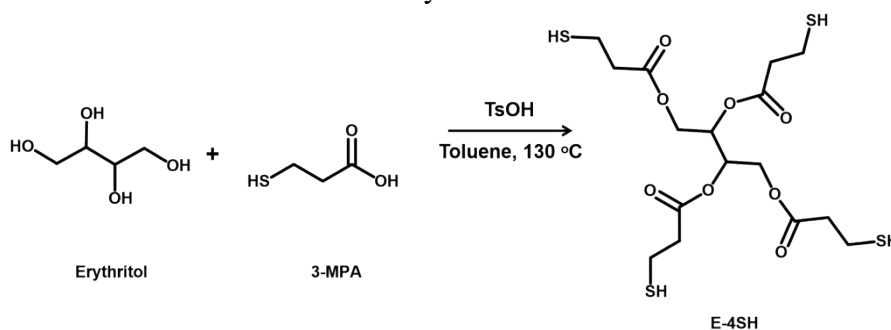

#### Scheme S2 Synthesis of G-3SH

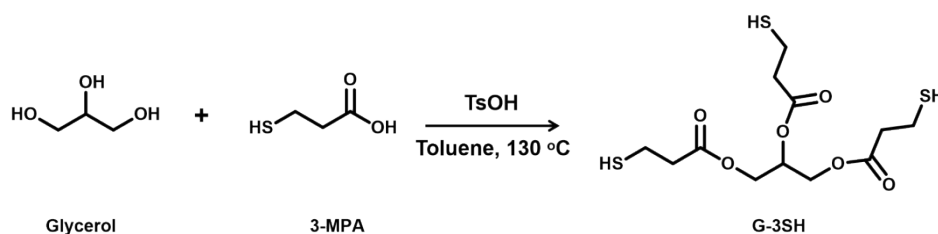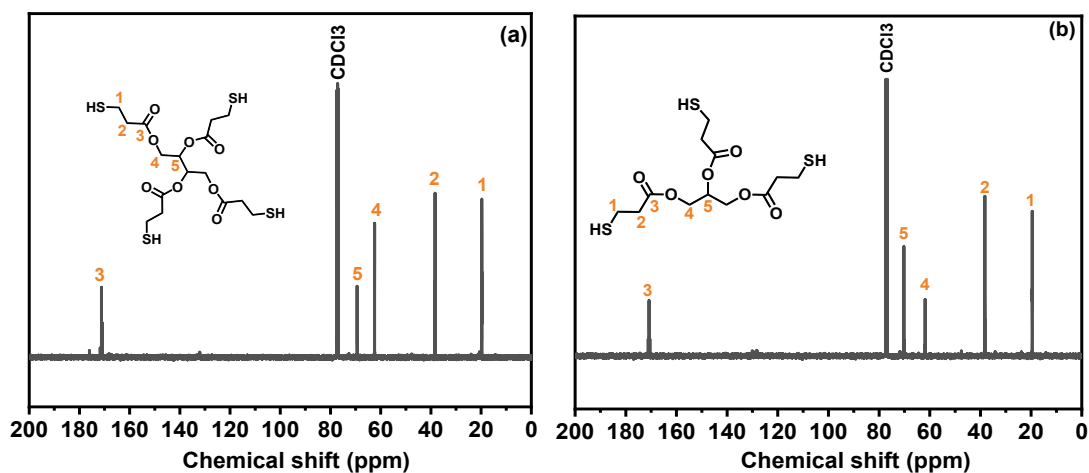

Fig. S1 <sup>13</sup>C NMR spectrum of (a) E-4SH and (b) G-3SH

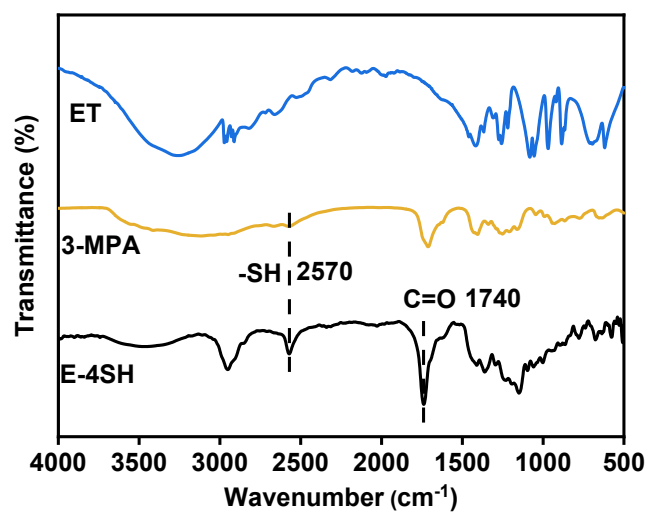

Fig. S2 FTIR spectra of ET, 3-MPA, E-4SH

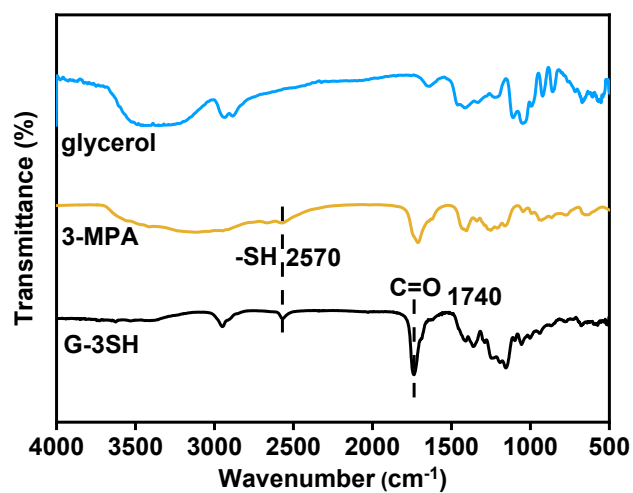

Fig. S3 FTIR spectra of glycerol, 3-MPA, G-3SH

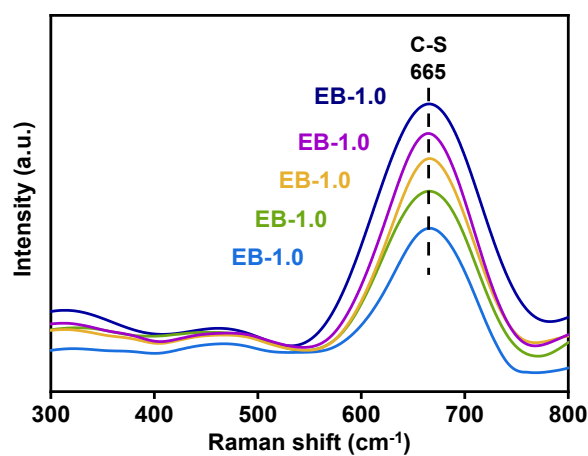

Fig. S4 Raman spectra of EB-x series

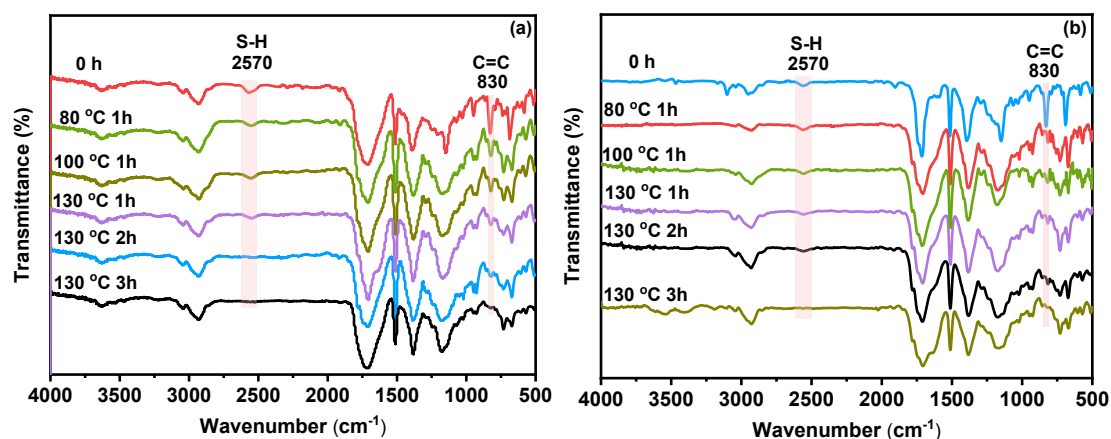

**Fig. S5** Thermal curing process of (a) EB-1.0 and (b) GB-1.0 monitored by FTIR spectroscopy.

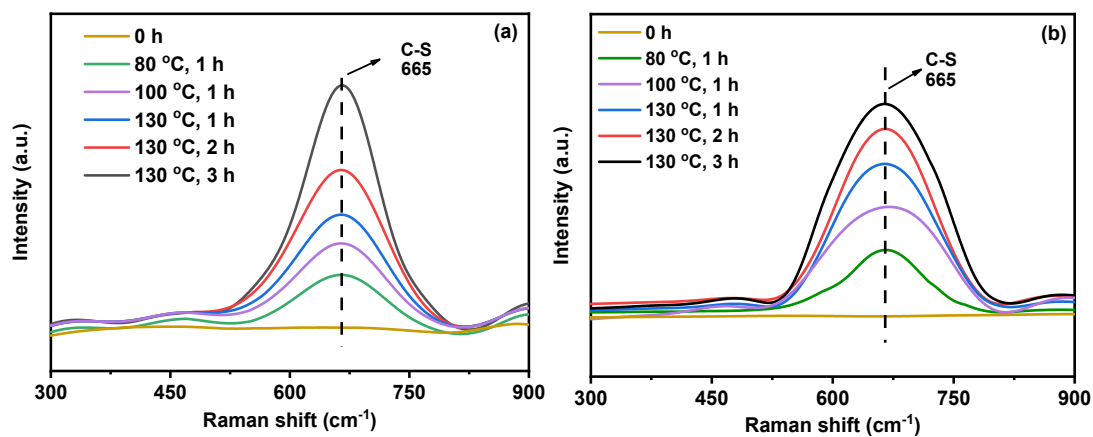

**Fig. S6** Thermal curing process of (a) EB-1.0 and (b) GB-1.0 monitored by Raman spectroscopy

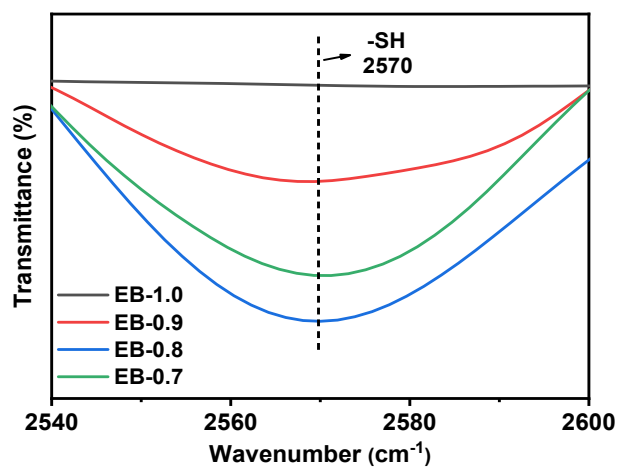

**Fig. S7** Normalized FTIR spectra of EB-x in the range from 2500 to 2600  $\text{cm}^{-1}$

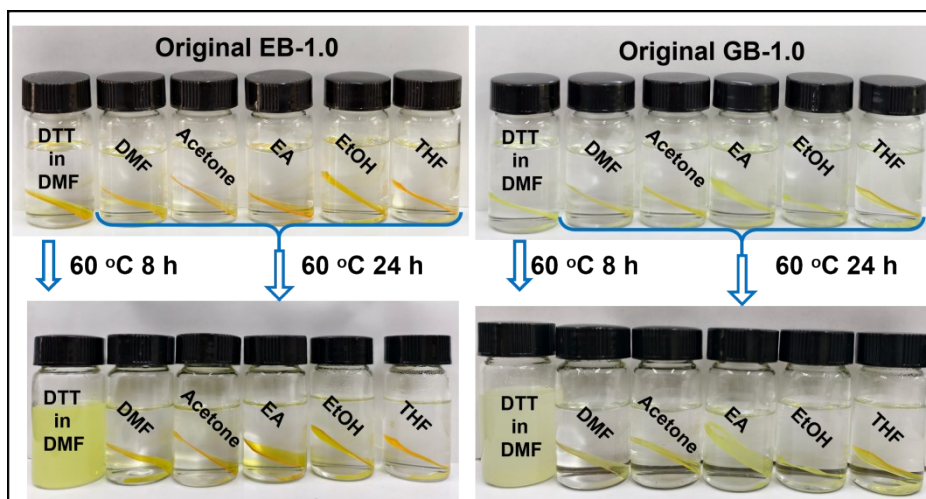

Fig. S8 Solvent resistance of EB-1.0 and GB-1.0 in different solvents

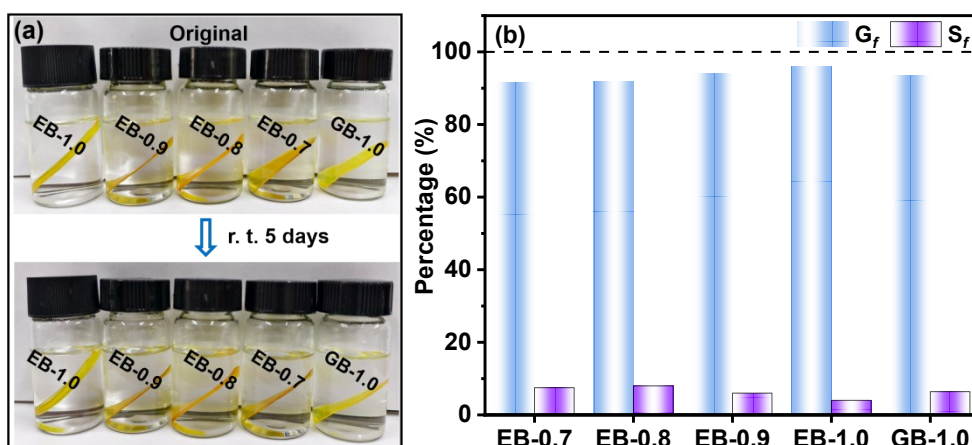

Fig. S9 (a) Swelling tests and (b) Gel fractions ( $G_f$ ) and soluble fractions ( $S_f$ ) of EB-x and GB-1.0 after immersion in DMF for 5 days at room temperature

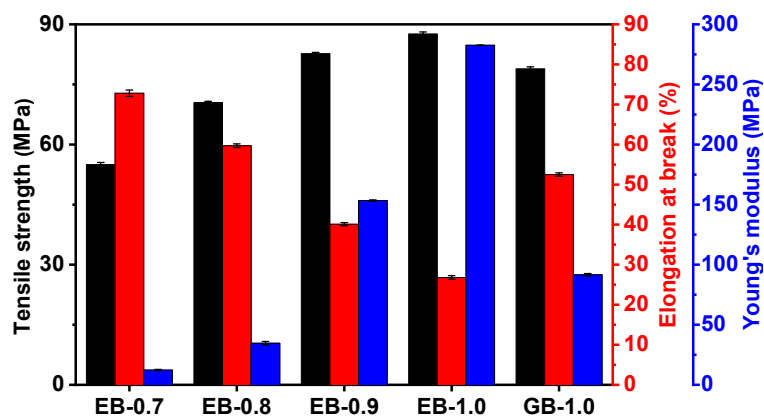

Fig. S10 Mechanical properties of EB-x and GB-1.0

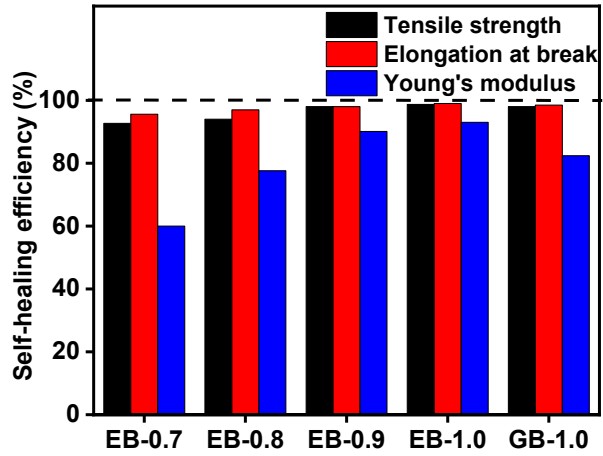

Fig. S11 Self-healing efficiency of EB-x and GB-1.0

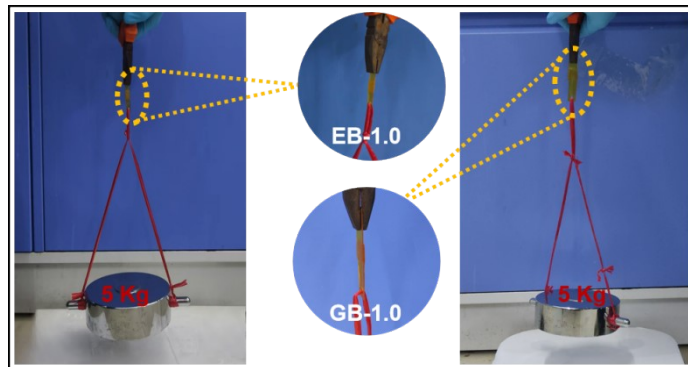

Fig. S12 Digital images of a welded EB-1.0 and GB-1.0 under a loading

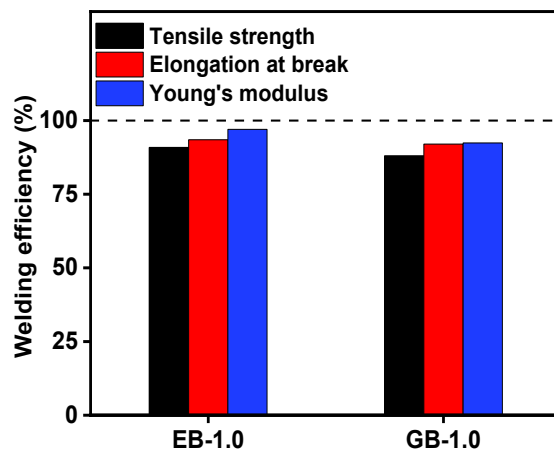

Fig. S13 Welding efficiency of EB-1.0 and GB-1.0

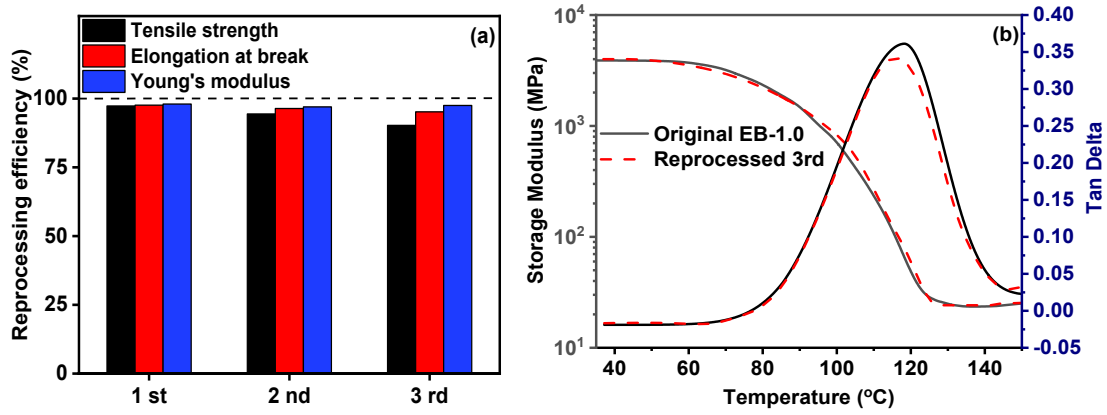

Fig. S14 (a) Reprocessing efficiency and (b) DMA curve of the reprocessed of EB-1.0

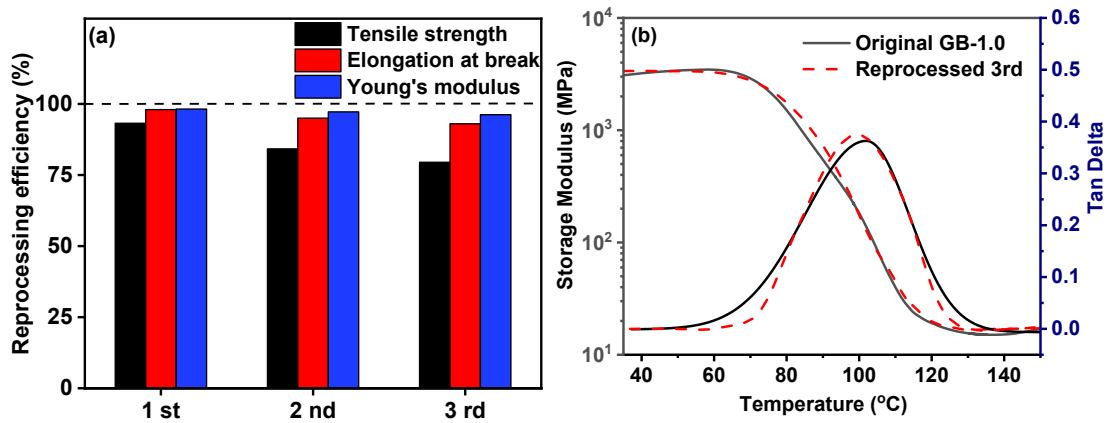

Fig. S15 (a) Reprocessing efficiency and (b) DMA curve of the reprocessed of GB-1.0

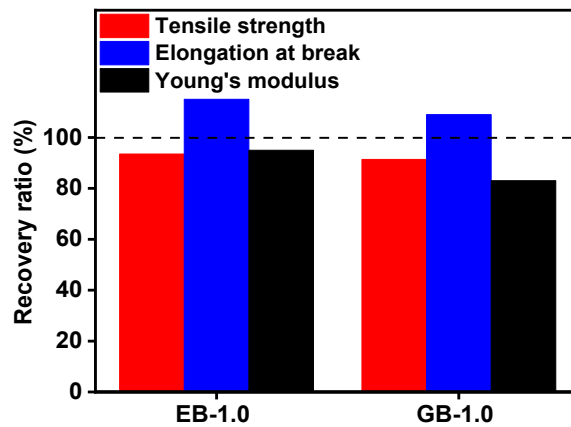

Fig. S16 Recovery ratio of the recycled EB-1.0 and GB-1.0

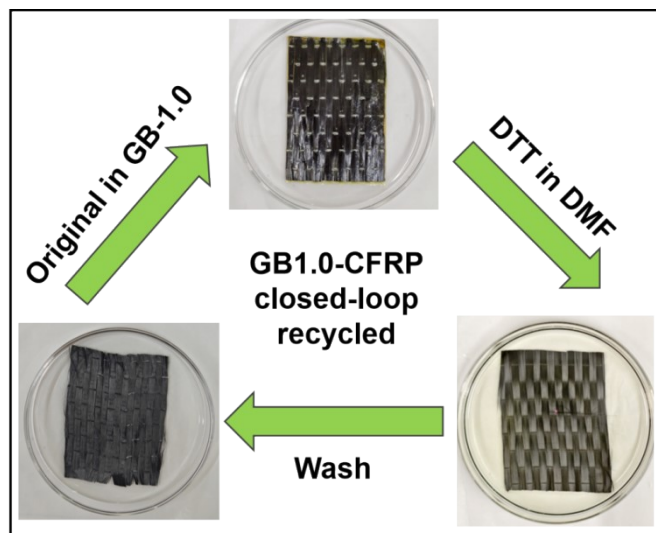

**Fig. S17** Digital images of recycling of GB-1.0-based CFRP composite
